# Supplementary material for: Disruption of the FasL/Fas axis protects against inflammation-derived tumorigenesis in chronic liver disease
Source: PubMed Central journal article supplement (PMC6368573; doi:10.1038/s41419-019-1391-x), 2019-02-08
Supplement: 41419_2019_1391_MOESM1_ESM.pdf [file 41419_2019_1391_MOESM1_ESM.pdf]

## SUPPLEMENTARY MATERIAL

### SUPPLEMENTARY FIGURE LEGENDS

**Supplementary Figure 1.** Generation and characterization of NEMO<sup>Δhepa</sup>/Fas<sup>lpr</sup> mice. (a) PCR blot of IKKγ/NEMO and Fas shows WT and knockout bands in NEMO<sup>ff</sup>, NEMO<sup>Δhepa</sup>, Fas<sup>lpr</sup> and NEMO<sup>Δhepa</sup>/Fas<sup>lpr</sup>. (b) Representative photograph of spleens and peritoneal lymph nodes of Fas<sup>lpr</sup> and NEMO<sup>Δhepa</sup>/Fas<sup>lpr</sup> mice. (c) The spleen size and (d) the number of peritoneal lymph nodes of 8 week-old NEMO<sup>ff</sup>, NEMO<sup>Δhepa</sup>, Fas<sup>lpr</sup> and NEMO<sup>Δhepa</sup>/Fas<sup>lpr</sup> is represented. Results are expressed as mean ± SEM ( $n=25$ , \*\* $p<0.01$ ; \*\* $p<0.01$ ).

**Supplementary Figure 2.** Markers of liver injury after Fas<sup>lpr</sup> deletion. (a) Serum AP and (b) GLDH levels of 8 week-old NEMO<sup>ff</sup>, NEMO<sup>Δhepa</sup>, Fas<sup>lpr</sup> and NEMO<sup>Δhepa</sup>/Fas<sup>lpr</sup> mice were determined. Results are expressed as mean ± SEM ( $n=25$ , \*\* $p<0.01$ ; \*\* $p<0.01$ ).

**Supplementary Figure 3.** Cell death, proliferation and inflammation markers after deficient FasL/FasR signaling. mRNA relative expression of (a) TNF and (b) TGFβ was quantified by RT-PCR and graphed.

**Supplementary Figure 4.** Infiltration of inflammatory cells into the liver. (a) FACS blot of proinflammatory macrophages CD11b/F4/80 is shown. (b) Representative CD11b staining of 8 week-old NEMO<sup>ff</sup>, NEMO<sup>Δhepa</sup>, Fas<sup>lpr</sup> and NEMO<sup>Δhepa</sup>/Fas<sup>lpr</sup> livers. (c) The positive Area Fraction was quantified in Image J©

and graphed. (d) Representative F4/80 staining of the same livers. (e) The positive Area Fraction was quantified in Image J© and graphed.

**Supplementary Figure 5.** Characterization of NEMO<sup>Δhepa</sup>/Fas<sup>lpr</sup>/TNFR1<sup>-/-</sup> mice. (a) Representative photograph of spleens and peritoneal lymph nodes of 8 week-old Fas<sup>lpr</sup>/TNFR1<sup>-/-</sup> and NEMO<sup>Δhepa</sup>/Fas<sup>lpr</sup>/TNFR1<sup>-/-</sup> mice. (b) The spleen size and (c) the number of peritoneal lymph nodes of 8 week-old Fas<sup>lpr</sup>/TNFR1<sup>-/-</sup> and NEMO<sup>Δhepa</sup>/Fas<sup>lpr</sup>/TNFR1<sup>-/-</sup> compared with NEMO<sup>f/f</sup>, NEMO<sup>Δhepa</sup>, Fas<sup>lpr</sup> and NEMO<sup>Δhepa</sup>/Fas<sup>lpr</sup> is represented. Results are expressed as mean ± SEM (n=25, \*\*p<0.01; \*\*\*p<0.001).

**Supplementary Figure 6.** Deletion of TNFR1 further protects against the NEMO-dependent hepatitis. Fas<sup>lpr</sup>/TNFR1<sup>-/-</sup> and NEMO<sup>Δhepa</sup>/Fas<sup>lpr</sup>/TNFR1<sup>-/-</sup> mice at the age of 8 weeks were sacrificed and livers extracted and analyzed. (a) Macroscopic appearance of livers. (b) Representative H&E staining of liver sections. (c) Serum ALT, (d) AP and (e) GLDH were determined in the same mice and compared to 8 week-old NEMO<sup>f/f</sup>, NEMO<sup>Δhepa</sup>, Fas<sup>lpr</sup> and NEMO<sup>Δhepa</sup>/Fas<sup>lpr</sup> mice. Results are expressed as mean ± SEM (n=25, \*\*p<0.05; \*\*\*p<0.001).

**Supplementary Figure 7.** Liver fibrogenesis is further decreased in 1 year-old NEMO<sup>Δhepa</sup>/Fas<sup>lpr</sup>/TNFR1<sup>-/-</sup> livers. Sirius red staining of paraffin-embedded liver tissue was performed and photomicrographs in polarized and normal light were taken in NEMO<sup>f/f</sup>, NEMO<sup>Δhepa</sup>, Fas<sup>lpr</sup> and NEMO<sup>Δhepa</sup>/Fas<sup>lpr</sup>, Fas<sup>lpr</sup>/TNFR1<sup>-/-</sup> and NEMO<sup>Δhepa</sup>/Fas<sup>lpr</sup>/TNFR1<sup>-/-</sup> mice at the age of 1 year.

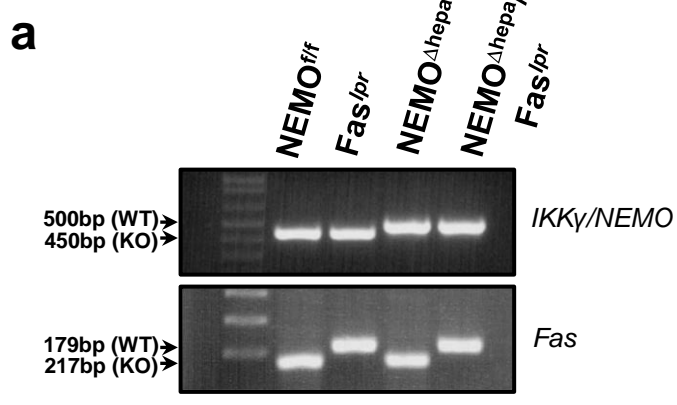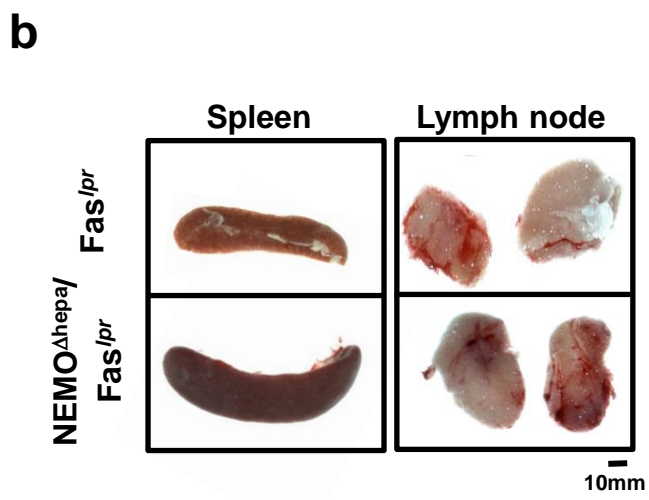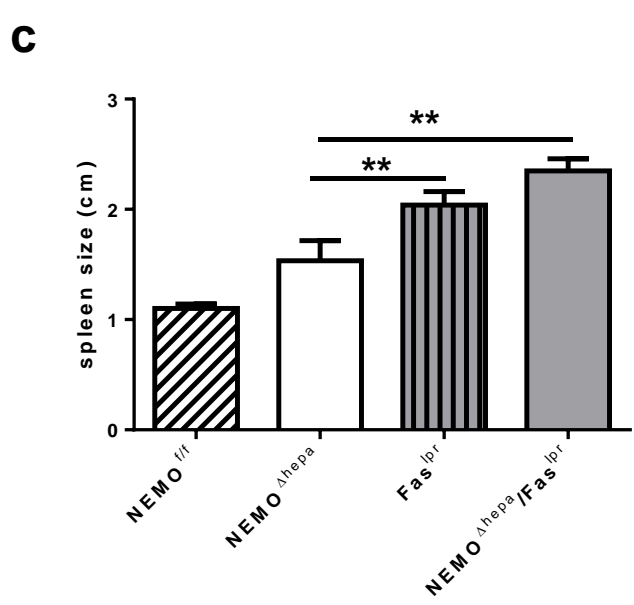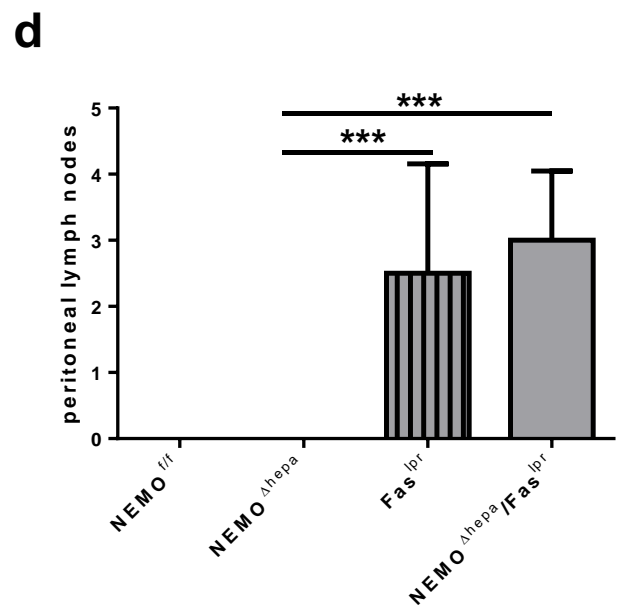

Supplementary Figure 1

**a**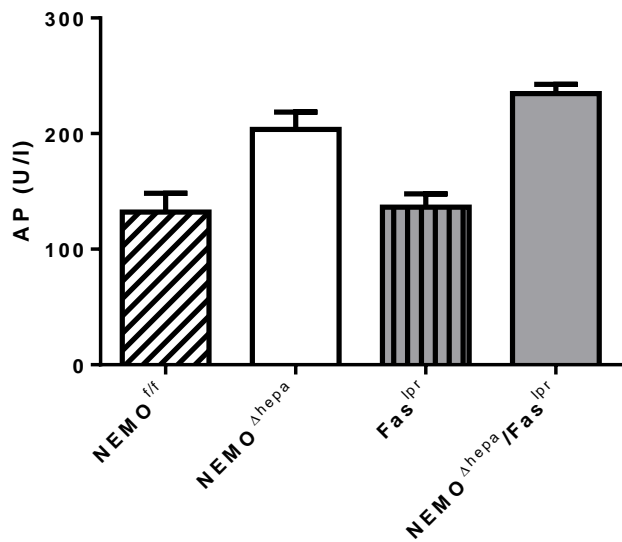**b**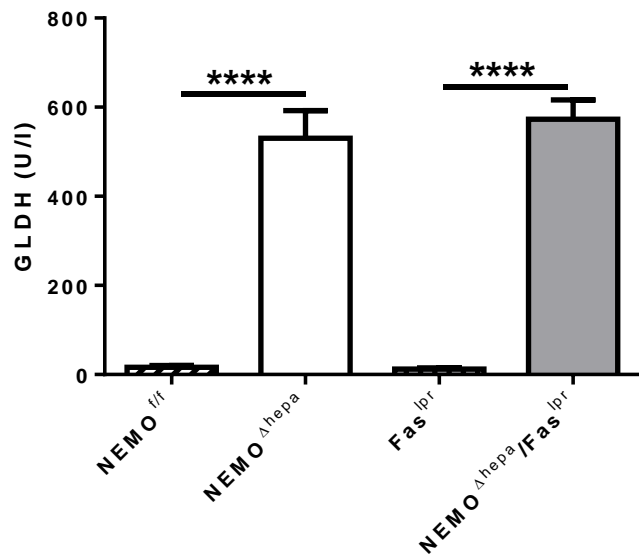**c**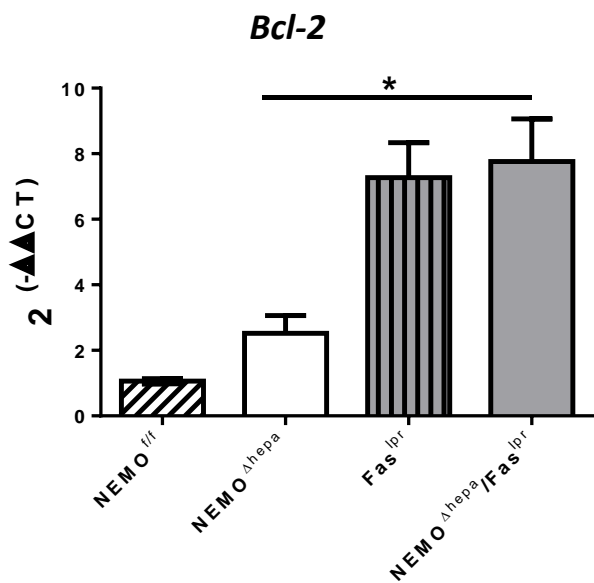**d**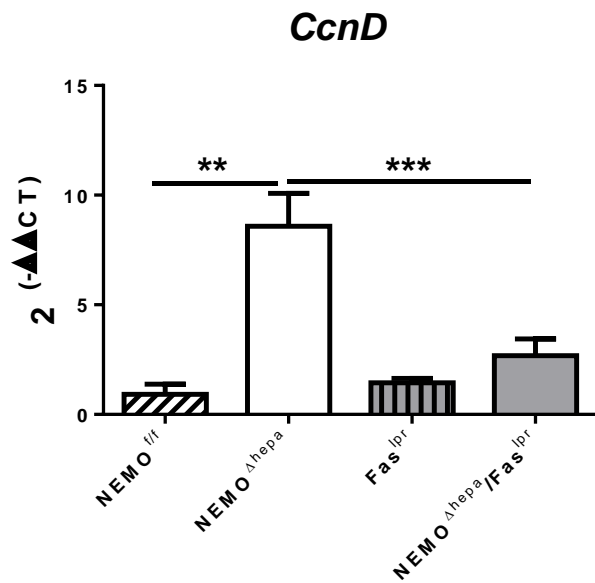

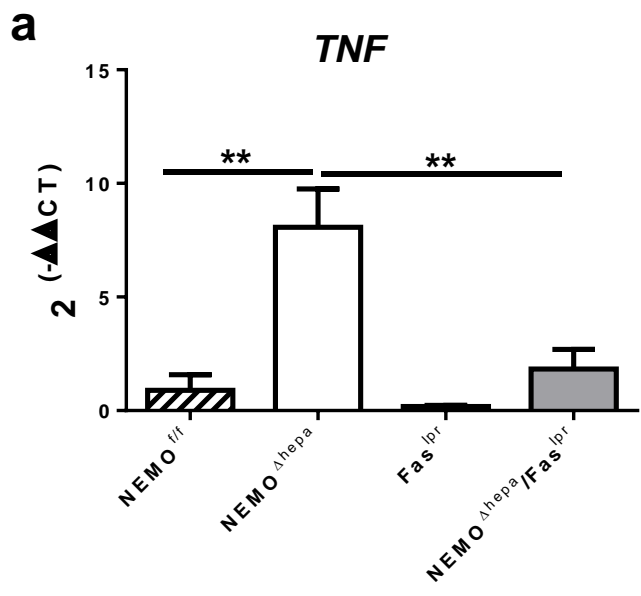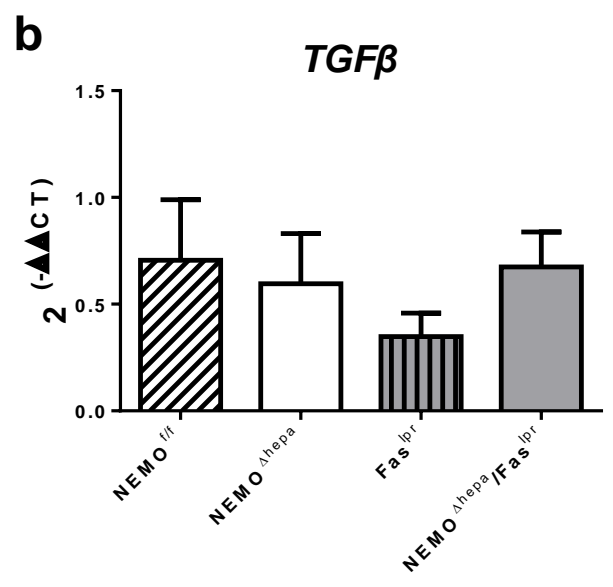

Supplementary Figure 3

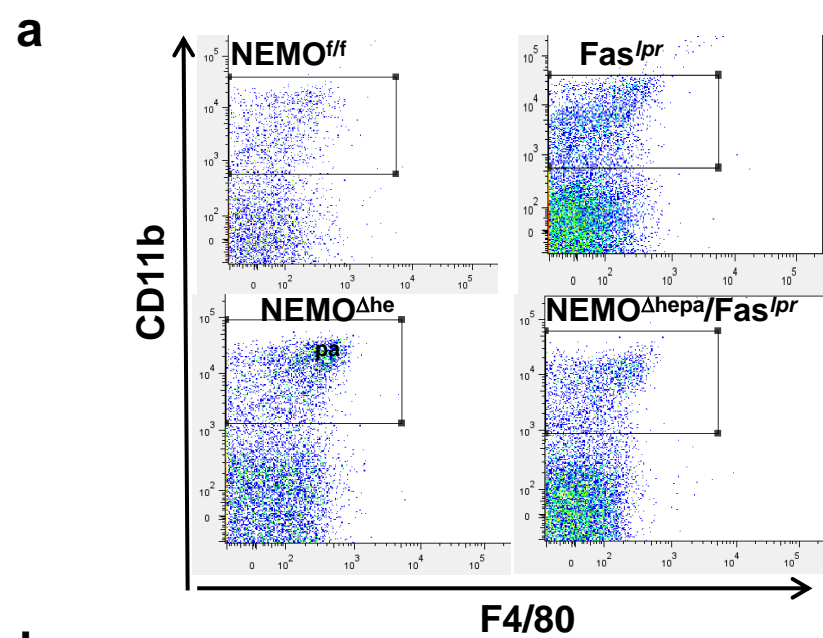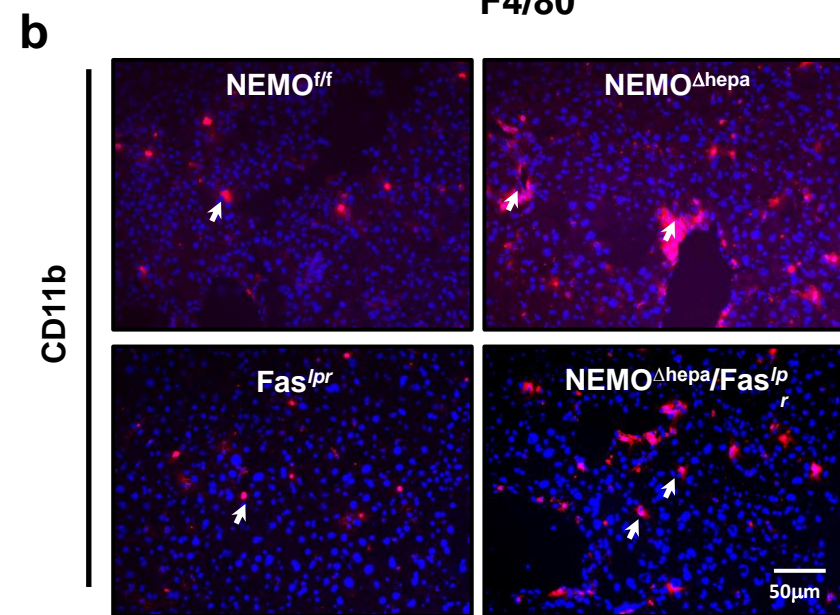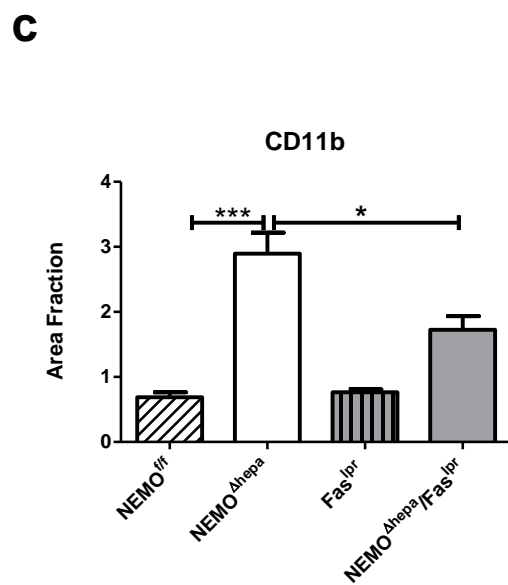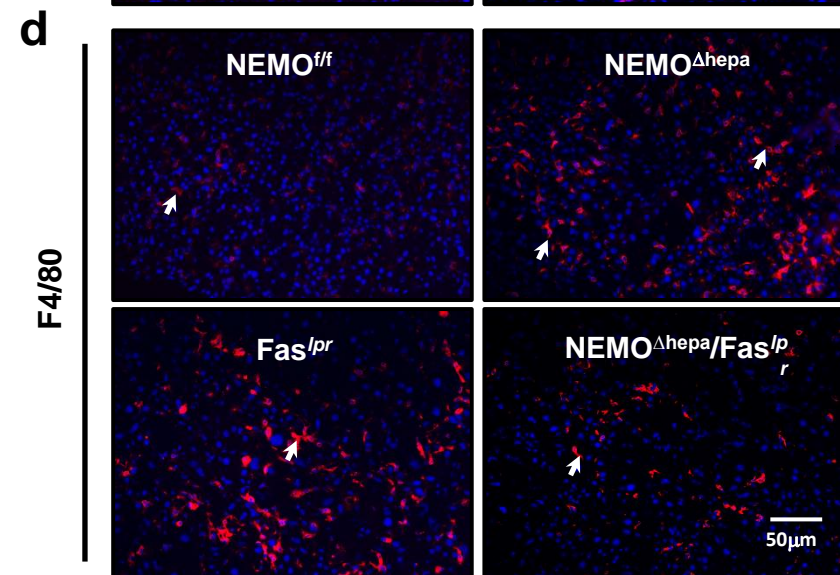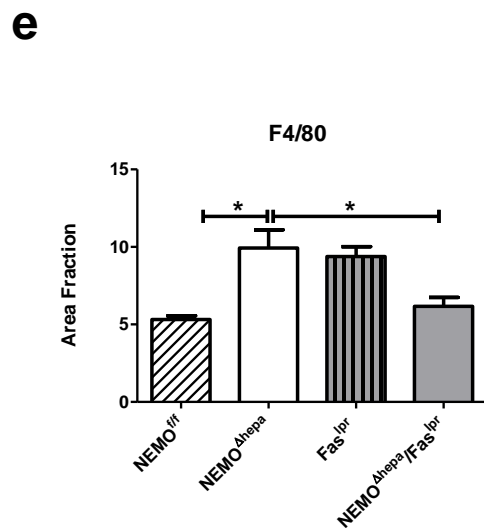

Supplementary Figure 4

**a**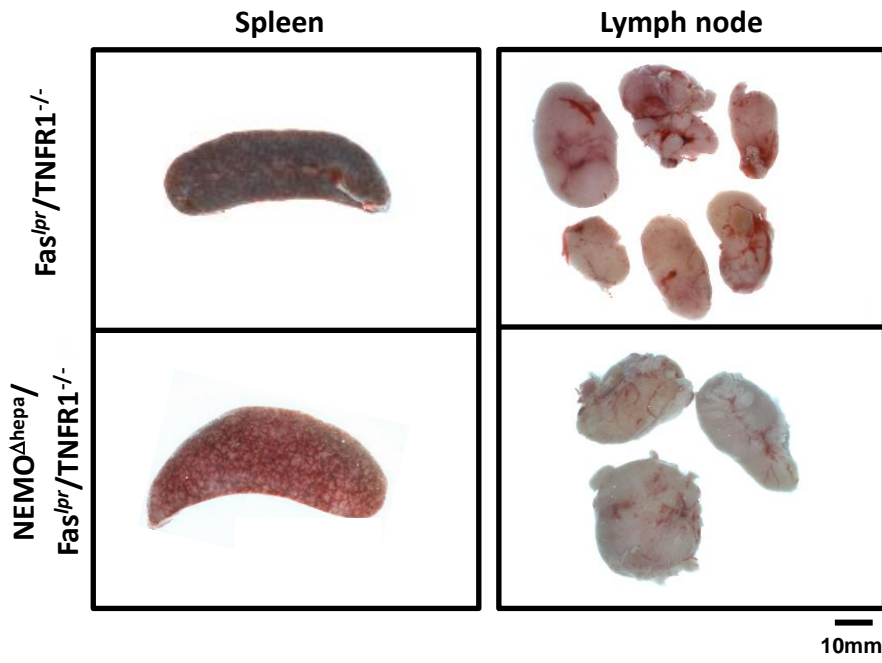**b**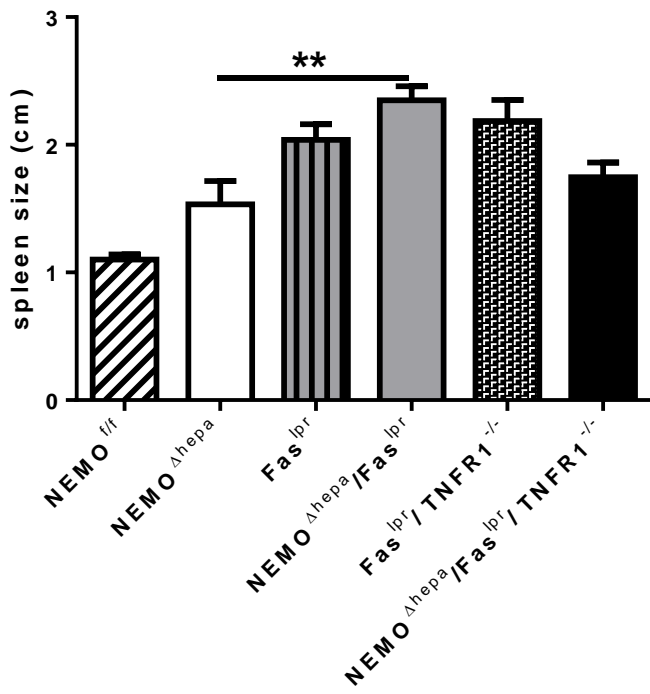**c**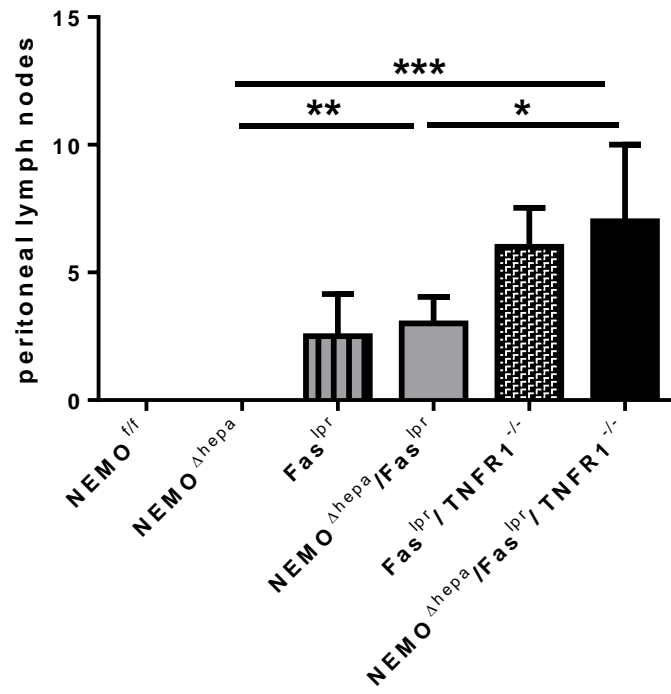

**a**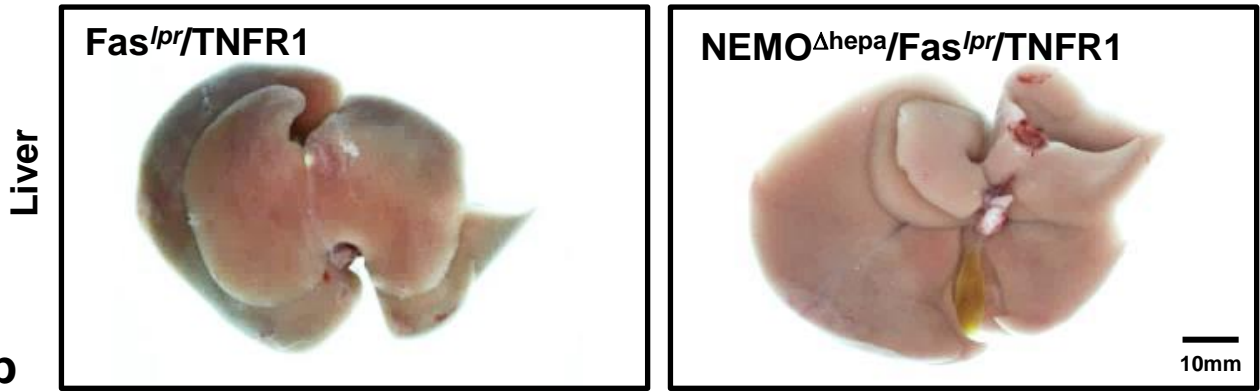**b**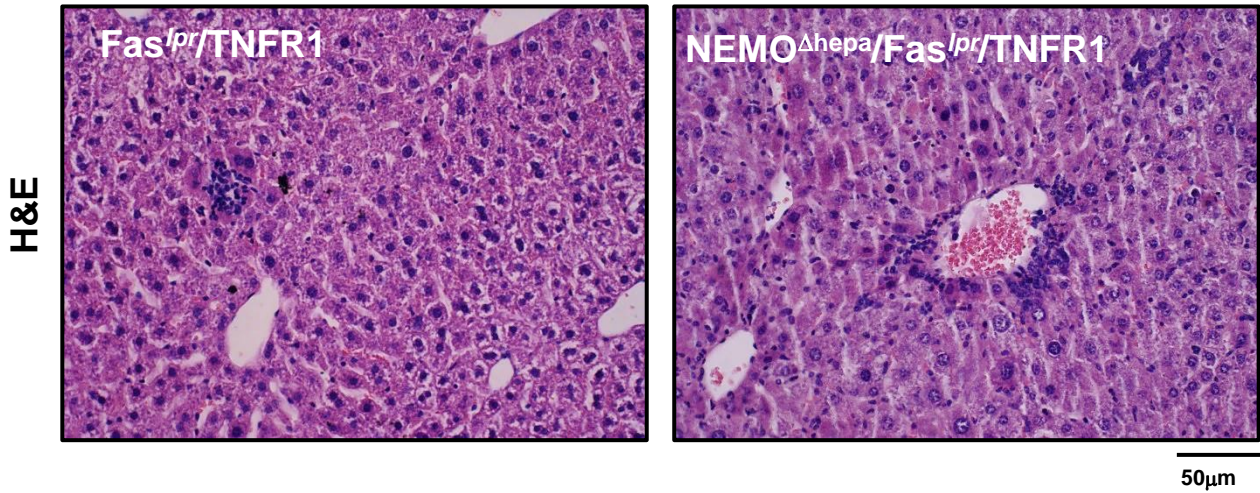**c**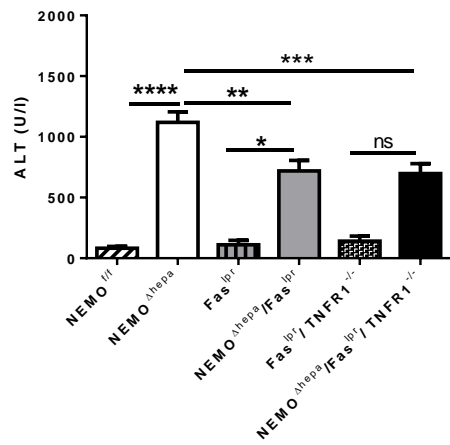**d**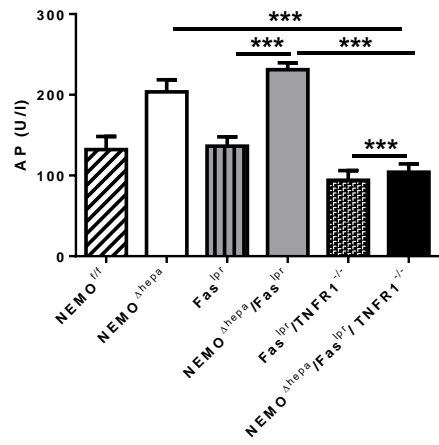**e**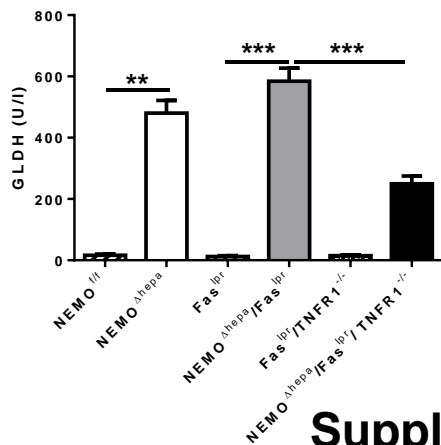

**Supplementary Figure 6**



Sirius red

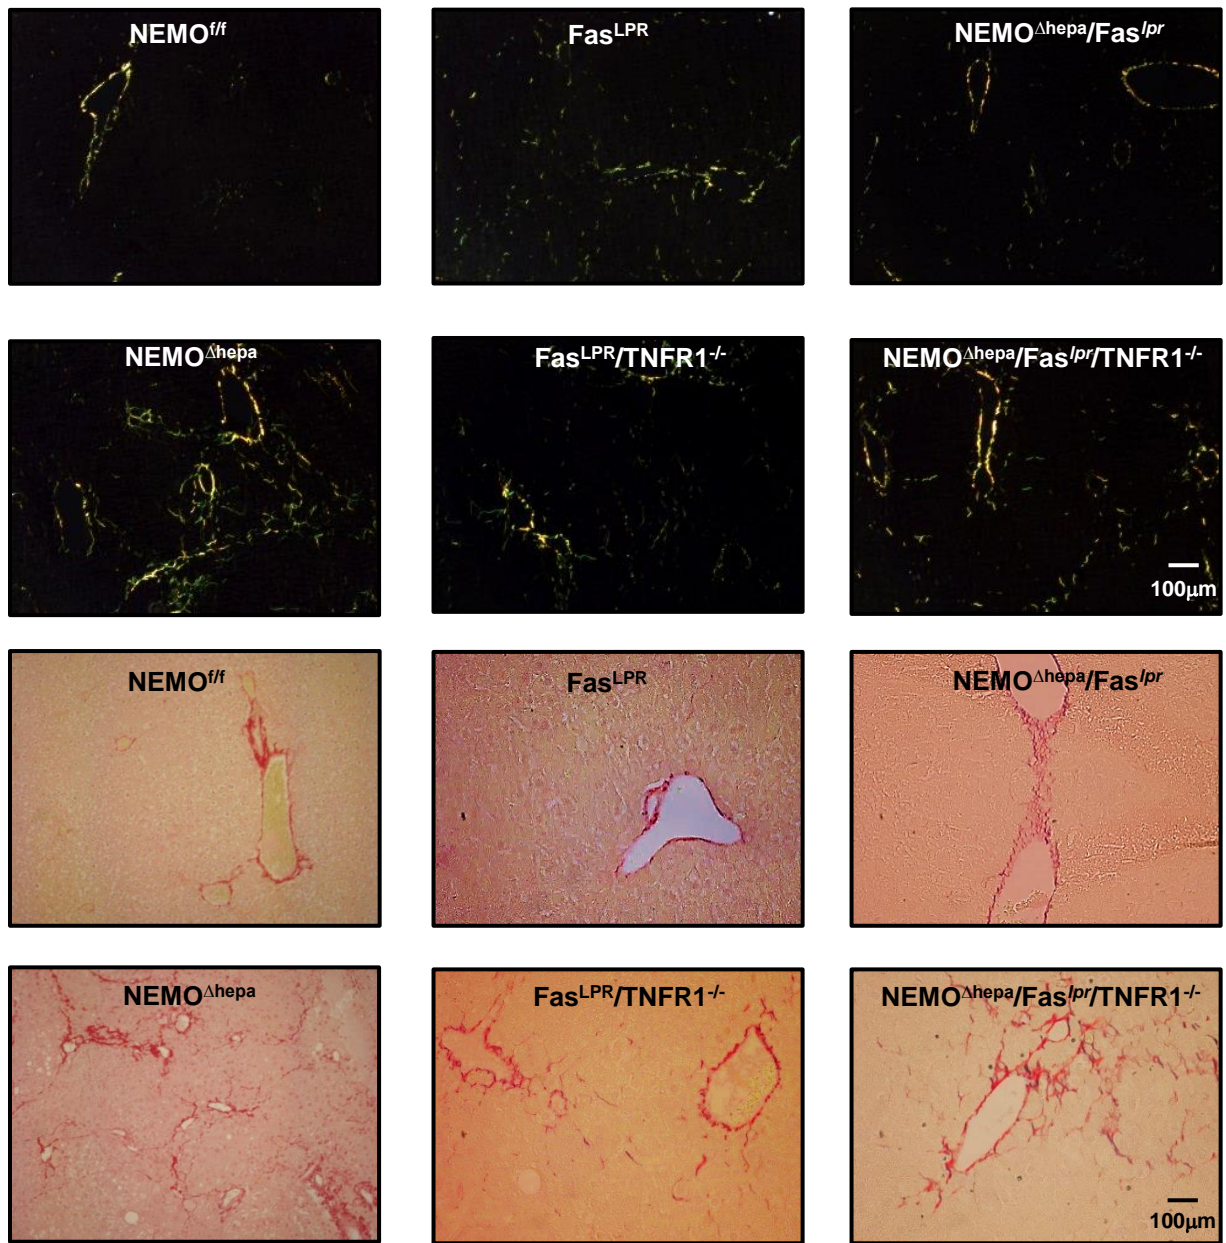

Supplementary Figure 7
